# Supplementary material
Source: MDPI journal article supplement (https://www.mdpi.com/1996-1073/12/4/749)
Supplement: s1 [file s1]

# Inter-criteria dependencies-based decision support in the sustainable wind energy management

Paweł Ziemia <sup>1,\*</sup>

<sup>1</sup> Faculty of Economics and Management, University of Szczecin, Mickiewicza 64, 71-101 Szczecin, Poland, e-mail: pawel.ziemia@usz.edu.pl

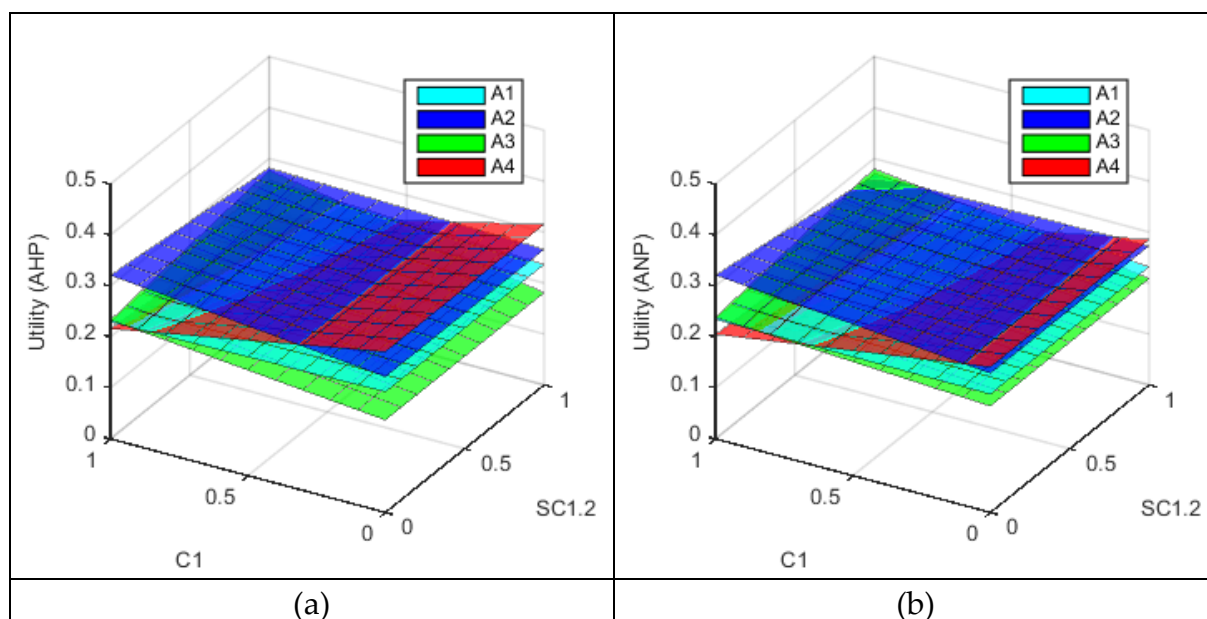

**Figure S1.** Utility of alternatives determined by means of: (a) the AHP method; (b) the ANP method; depending on the weight of the criterion C1 and sub-criterion C1.2

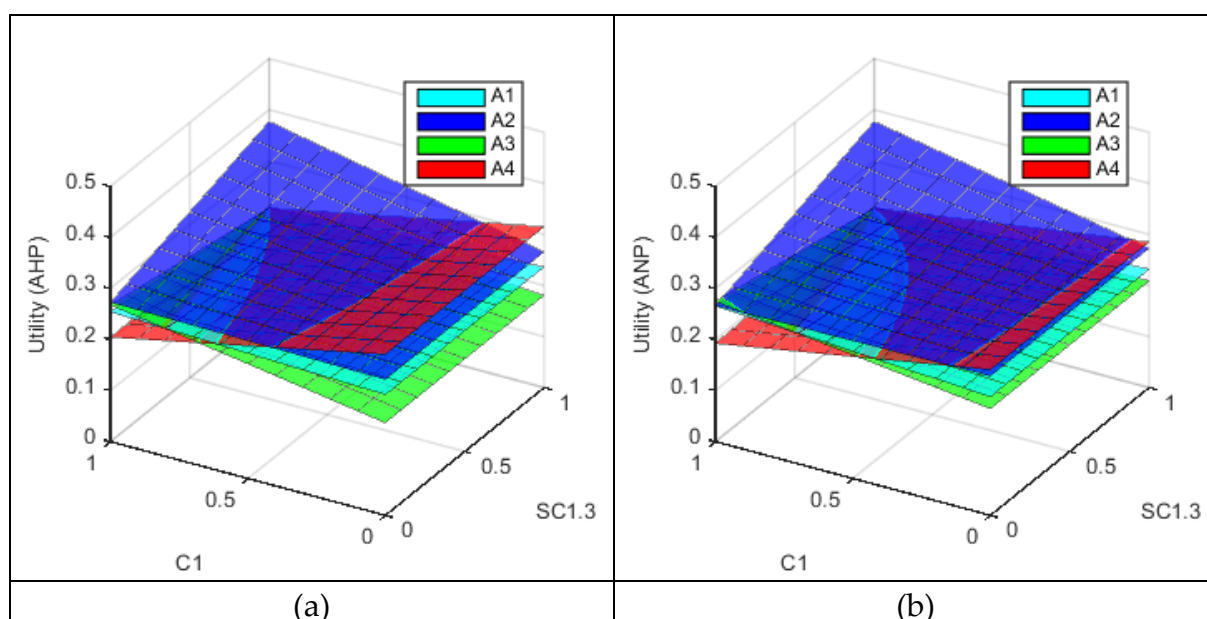

**Figure S2.** Utility of alternatives determined by means of: (a) the AHP method; (b) the ANP method; depending on the weight of the criterion C1 and sub-criterion C1.3

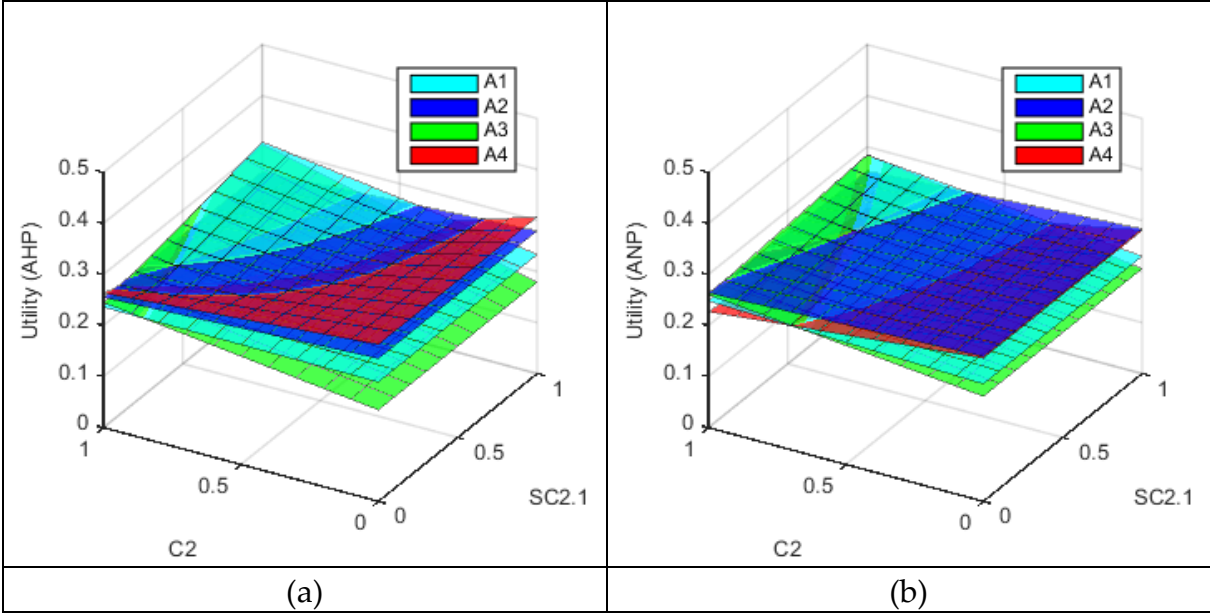

Figure S3. Utility of alternatives determined by means of: (a) the AHP method; (b) the ANP method; depending on the weight of the criterion C2 and sub-criterion C2.1

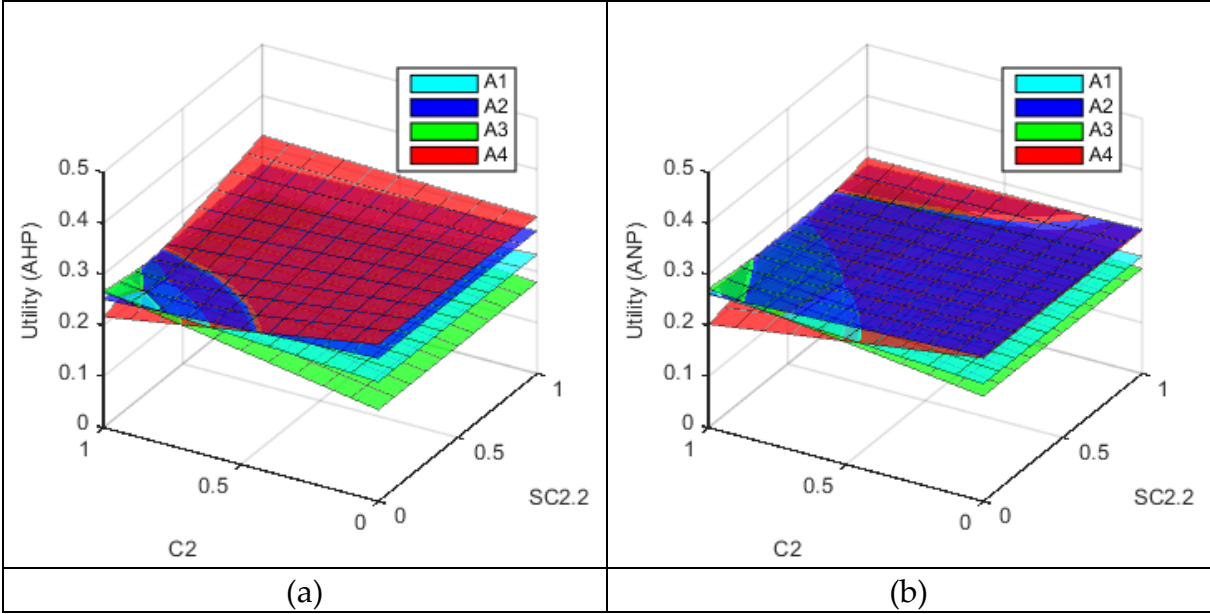

Figure S4. Utility of alternatives determined by means of: (a) the AHP method; (b) the ANP method; depending on the weight of the criterion C2 and sub-criterion C2.2

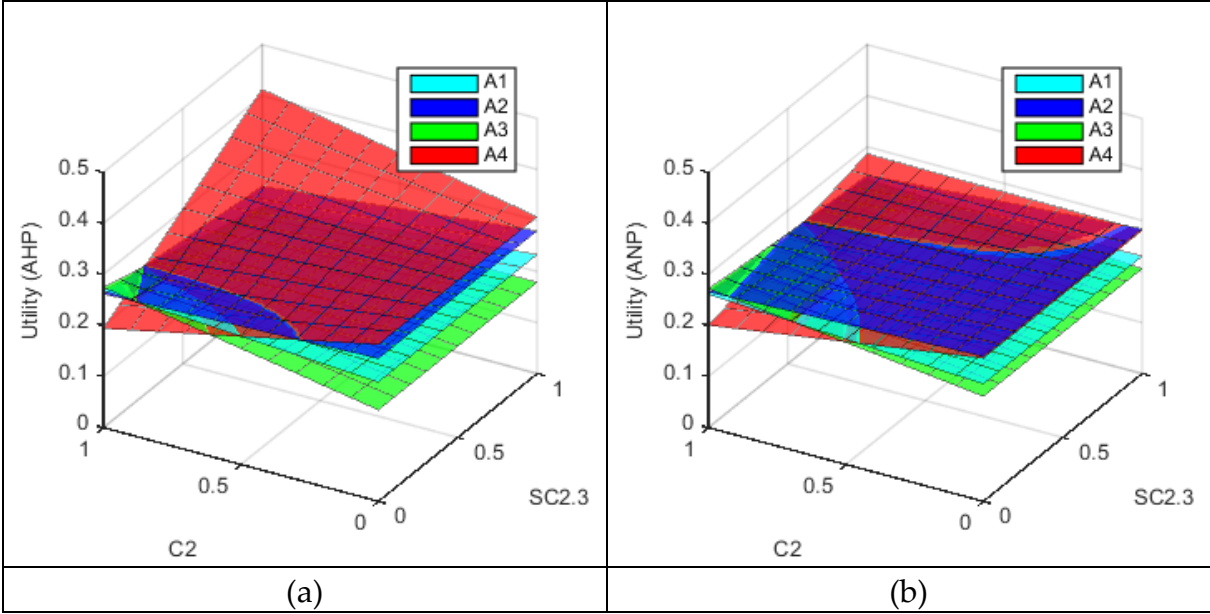

Figure S5. Utility of alternatives determined by means of: (a) the AHP method; (b) the ANP method; depending on the weight of the criterion C2 and sub-criterion C2.3

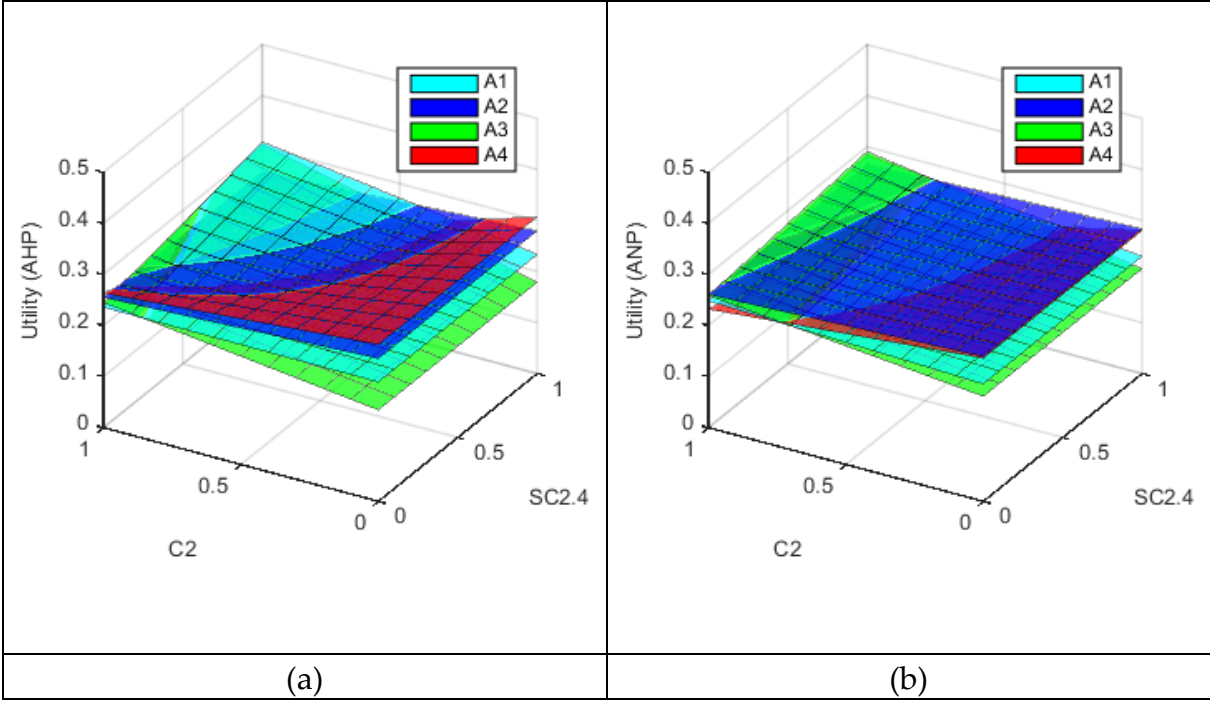

Figure S6. Utility of alternatives determined by means of: (a) the AHP method; (b) the ANP method; depending on the weight of the criterion C2 and sub-criterion C2.4

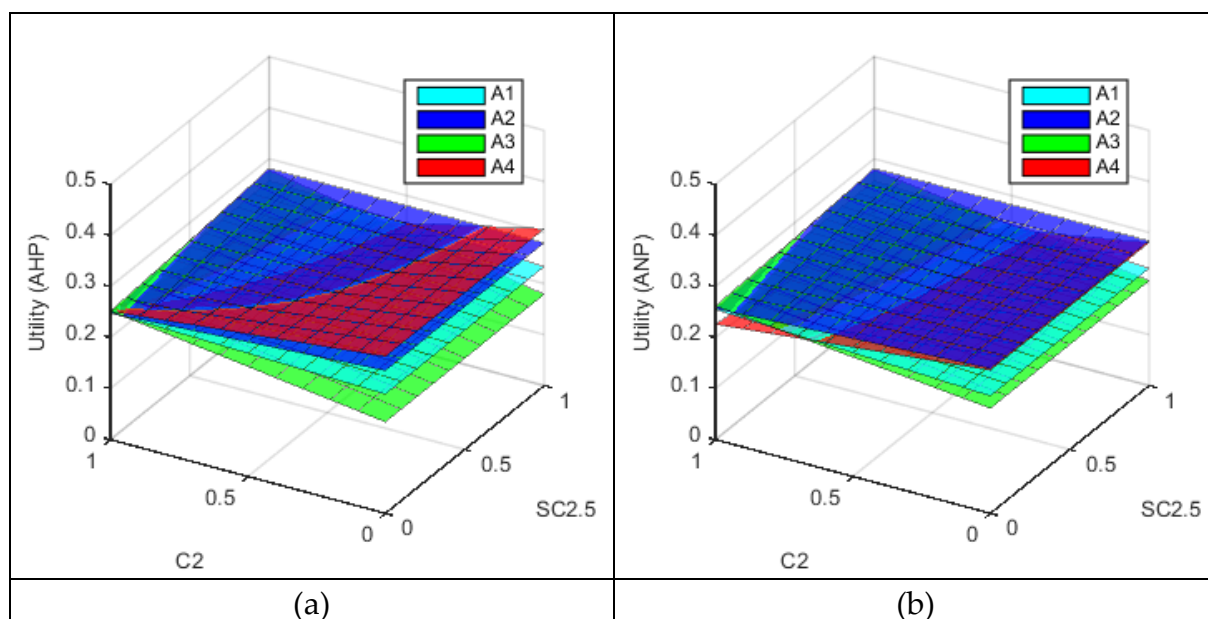

**Figure S7.** Utility of alternatives determined by means of: (a) the AHP method; (b) the ANP method; depending on the weight of the criterion C2 and sub-criterion C2.5

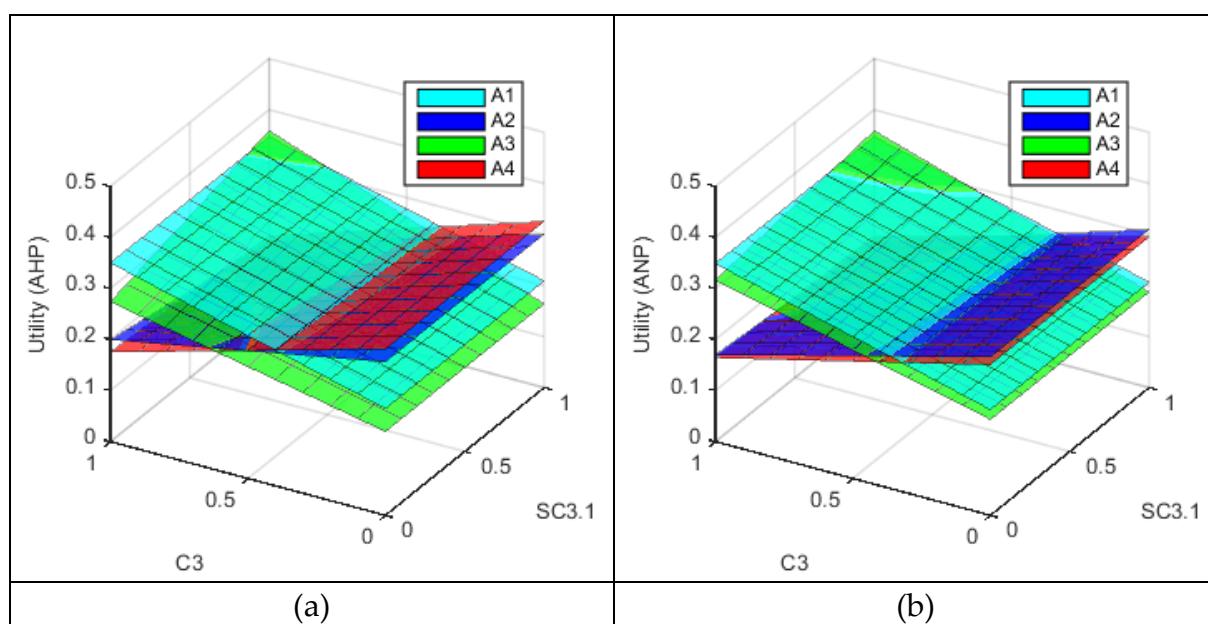

**Figure S8.** Utility of alternatives determined by means of: (a) the AHP method; (b) the ANP method; depending on the weight of the criterion C3 and sub-criterion C3.1

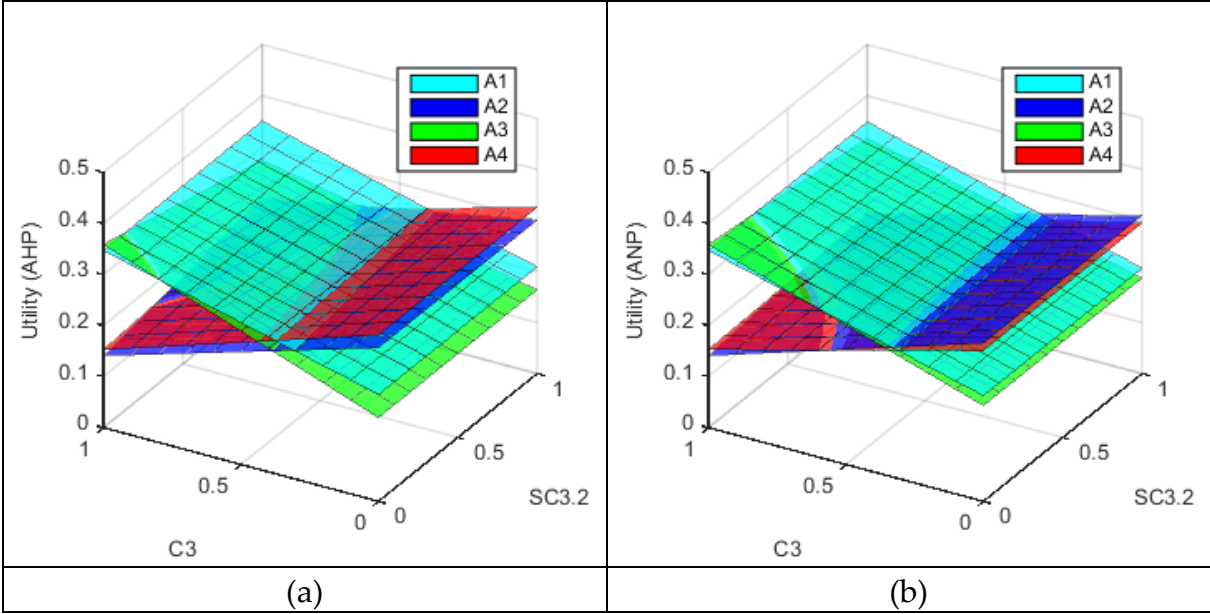

Figure S9. Utility of alternatives determined by means of: (a) the AHP method; (b) the ANP method; depending on the weight of the criterion C3 and sub-criterion C3.2

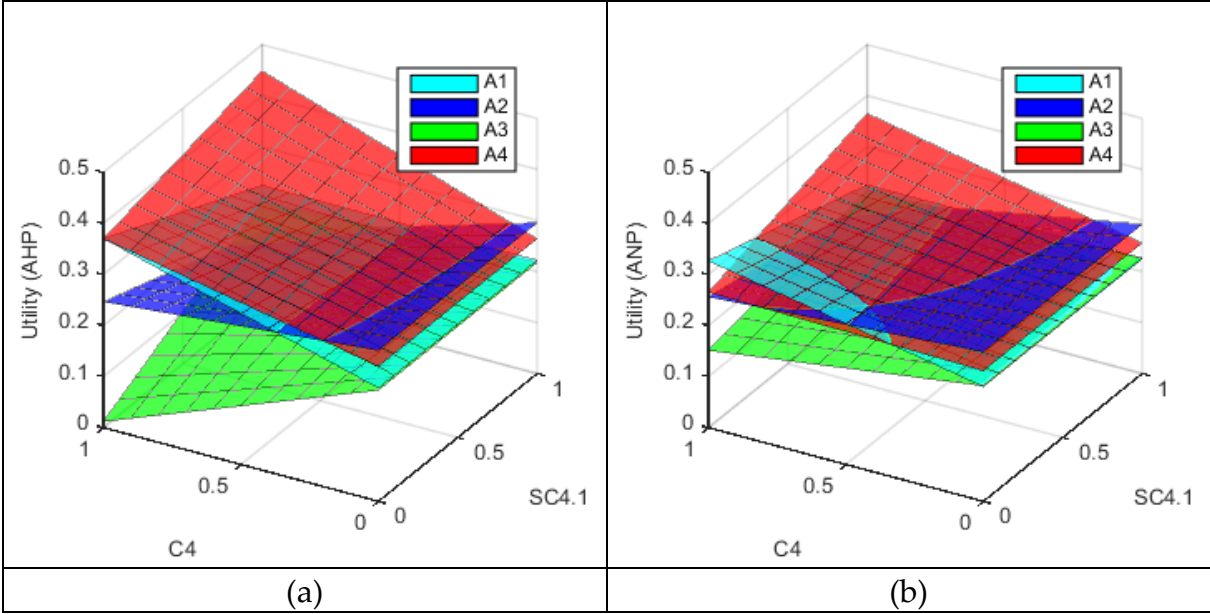

Figure S10. Utility of alternatives determined by means of: (a) the AHP method; (b) the ANP method; depending on the weight of the criterion C4 and sub-criterion C4.1

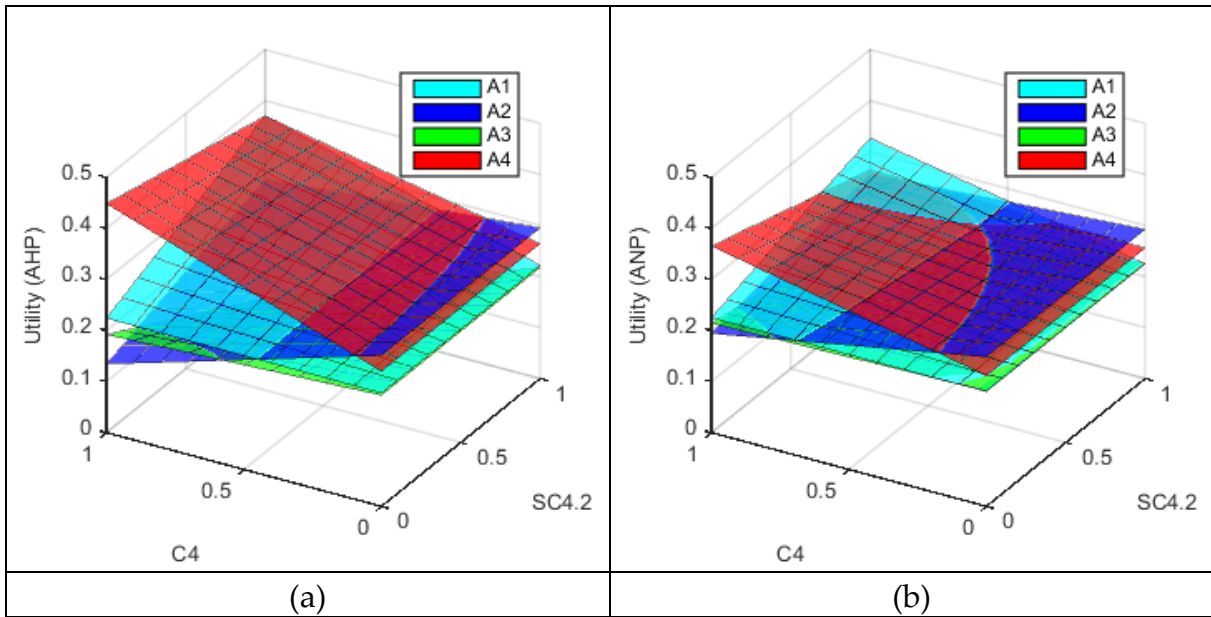

**Figure S11.** Utility of alternatives determined by means of: (a) the AHP method; (b) the ANP method; depending on the weight of the criterion C4 and sub-criterion C4.2

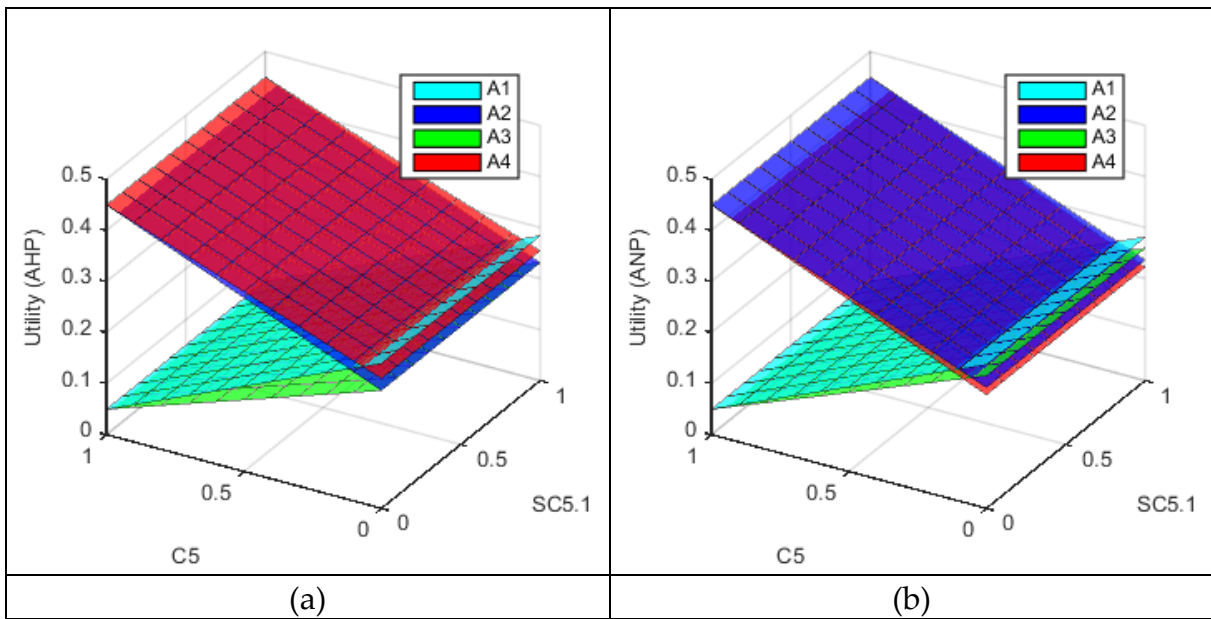

**Figure S12.** Utility of alternatives determined by means of: (a) the AHP method; (b) the ANP method; depending on the weight of the criterion C5 and sub-criterion C5.1

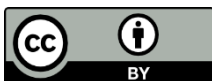

© 2019 by the authors. Submitted for possible open access publication under the terms and conditions of the Creative Commons Attribution (CC BY) license (<http://creativecommons.org/licenses/by/4.0/>).
